# Supplementary material for: Mechanistic platform knowledge of concomitant sugar uptake in Escherichia coli BL21(DE3) strains
Source: PubMed Central journal article supplement (PMC5362885; doi:10.1038/srep45072), 2017-03-23
Supplement: srep45072-s1.pdf [file srep45072-s1.pdf]

**Mechanistic platform knowledge of concomitant sugar uptake in  
*Escherichia coli* BL21(DE3) strains**

**Supplementary Files**

David J. Wurm<sup>1\*</sup>, Johanna Hausjell<sup>1\*</sup>, Sophia Ulonska<sup>1</sup>, Christoph Herwig<sup>1,2</sup>, Oliver Spadiut<sup>1,2</sup>

*<sup>1</sup>Research Division Biochemical Engineering, Institute of Chemical Engineering, Vienna  
University of Technology, Vienna, Austria*

*<sup>2</sup>Christian Doppler Laboratory for Mechanistic and Physiological Methods for Improved  
Bioprocesses, Institute of Chemical Engineering, Vienna University of Technology, Vienna,  
Austria*

*\*These authors contributed equally to this work*

Correspondence and requests for materials should be addressed to:

Oliver Spadiut, TU Wien, Institute of Chemical Engineering, Research Area Biochemical Engineering, Gumpendorfer Strasse 1a, 1060 Vienna, Austria. Tel: +43 1 58801 166473, Fax: +43 1 58801 166980, Email: [oliver.spadiut@tuwien.ac.at](mailto:oliver.spadiut@tuwien.ac.at)

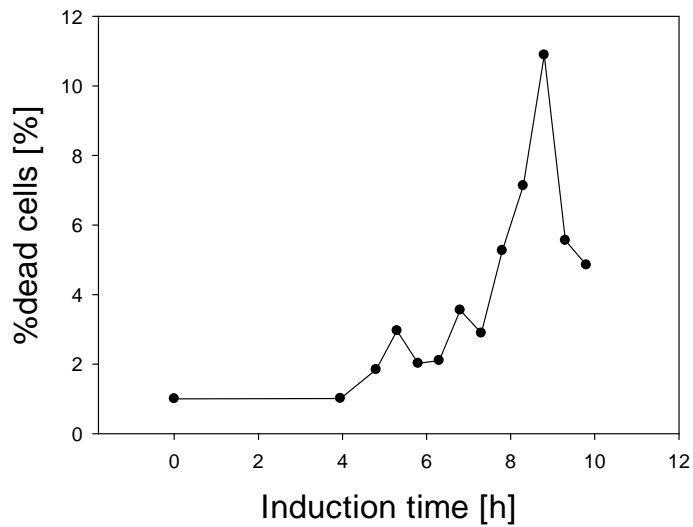

**Supplementary Fig. 1:** Dead cells during cultivation shown in Figure 2C and 2D measured by Flow cytometry.

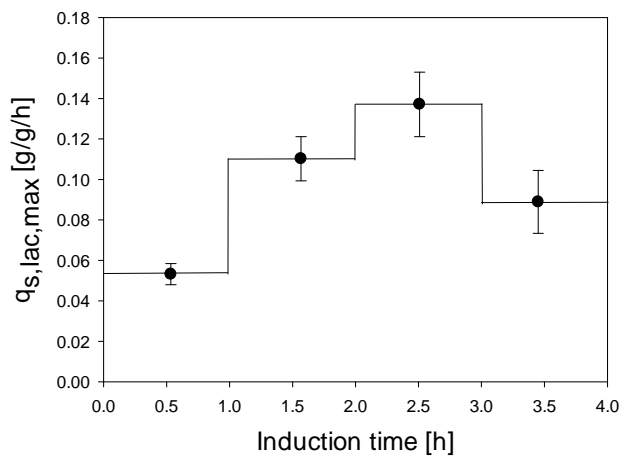

**Supplementary Fig. 2:**  $q_{s,lac,max}$  of cultivation shown in Figure 2C and 2D values during first 4 h after induction for investigating duration of adaption phase. Errors were calculated by error propagation from standard deviations of DCW and sugar measurements which were carried out in triplicates.

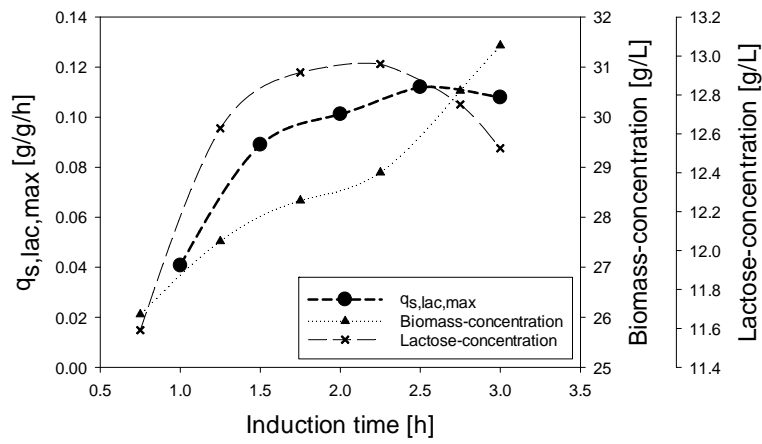

**Supplementary Fig. 3:** Exemplary data for obtained  $q_{s,lac,max}$  values from at-line determination of biomass (via  $OD_{600}$ ) and sugar analysis in the supernatant (via HPLC) showing a constant  $q_{s,lac}$  and thus full adaption of the cells after 2 h.
